# Supplementary material for: Artificial Termite-Fishing Tasks as Enrichment for Sanctuary-Housed Chimpanzees: Behavioral Effects and Impact on Welfare
Source: MDPI journal article supplement (doi:10.3390/ani11102941), 2021-10-11
Supplement: s1 [file s1]

## Supplementary tables

Optimization of SPIO injection for sentinel lymph node dissection in a rat model.

Mirjam C.L. Peek<sup>†1</sup>, Kohei Saeki<sup>†\*2§</sup>, Kaichi Ohashi<sup>3</sup>, Shinichi Chikaki<sup>3</sup>, Rose Baker<sup>4</sup>, Takayuki Nakagawa<sup>2</sup>, Moriaki Kusakabe<sup>5</sup>, Michael Douek<sup>1</sup> and Masaki Sekino<sup>3</sup>.

1 Division of Cancer Studies, King's College London, Guy's Hospital Campus, Great Maze Pond, London, UK

2 Laboratory of Veterinary Surgery, Graduate School of Agricultural and Life Sciences, University of Tokyo, Tokyo, Japan

3 Department of Electrical Engineering and Information Systems, Graduate School of Engineering, University of Tokyo, Tokyo, Japan

4 Department of Statistics, School of Business 612, Maxwell Building, University of Salford, Salford, UK

5 Advanced Technology Research Laboratory, Research Centre for Food Safety, Graduate School of Agricultural and Life Sciences, University of Tokyo, Tokyo, Japan

† These authors contributed equally to the work.

\* Correspondence: ko-saeki@vet.ous.ac.jp (K.S.)

§ Current affiliation: Department of Veterinary Medicine, Okayama University of Science, Ehime, Japan

**Table S1.** Descriptive statistics of the dose increase experiment and the MRI experiment.

| Group | Iron in the SLN (µg)  | Iron at the injection site (µg) | Iron in the secondary node (µg) | Artefact size at the SLN on MRI (cm) |
|-------|-----------------------|---------------------------------|---------------------------------|--------------------------------------|
| 2     | 0.05 (0.04 , 0.09)    | 6.97 (4.47 , 7.58)              | -                               | 0 (0 , 0.14)                         |
| 10    | 0.86 (0.32 , 1)       | 36.04 (25.33 , 159.89)          | -                               | -                                    |
| 20    | 2.05 (1.71 , 3.06)    | 18.81 (17.92 , 32.63)           | -                               | 0.27 (0.2 , 0.29)                    |
| 40    | 3.34 (2.6 , 4.49)     | 29.57 (25.79 , 30.63)           | -                               | 0.35 (0.27 , 0.44)                   |
| 100   | 9.35 (6.29 , 15.55)   | 67.09 (43.86 , 76.38)           | -                               | 0.6 (0.49 , 0.63)                    |
| 200   | 19.96 (13.49 , 24.48) | 128.54 (111.24 , 179.38)        | -                               | 0.61 (0.56 , 0.7)                    |
| 1000  | 64.93 (48.63 , 85.49) | 589.74 (551.1 , 679.1)          | 40.79 (36.83 , 44.74)           | -                                    |
| 2000  | 80.54 (57.9 , 139)    | 1205.05 (1101.51 , 1594.41)     | 68.59 (55.17 , 94.59)           | 0.86 (0.79 , 0.98)                   |
| 2790  | 73.07 (49.12 , 98.5)  | 1716.23 (1497.99 , 1950.29)     | 73.96 (50.77 , 94.04)           | -                                    |
| 4000  | 80.52 (61.26 , 98.01) | 3052.68 (2627.55 , 3312.71)     | -                               | -                                    |

Values were reported as median (range). SLN: sentinel lymph node. MRI; magnetic resonance imaging.

**Table S2.** Descriptive statistics of the dilution and time-course experiment.

| <b>Group</b>    |                   | <b>Iron in the SLN (µg)</b> | <b>Iron at the injection site (µg)</b> | <b>Iron in the secondary node (µg)</b> |
|-----------------|-------------------|-----------------------------|----------------------------------------|----------------------------------------|
| <b>Dilution</b> | <b>Time (min)</b> |                             |                                        |                                        |
| x1              | 10                | 0.46 (0.21 , 3.2)           | 185.72 (162.91 , 212.36)               | -                                      |
|                 | 30                | 1.95 (0.47 , 5.01)          | 175.33 (134.95 , 192.14)               | -                                      |
|                 | 60                | 1.6 (0.84 , 2.36)           | 188.22 (180 , 197.65)                  | -                                      |
|                 | 360               | 10.37 (7.14 , 13.24)        | 140.09 (62.65 , 187.89)                | -                                      |
|                 | 1440              | 16.41 (15.86 , 21.26)       | 143.65 (139.44 , 151.64)               | 3.07 (2.82 , 3.32)                     |
| x2              | 10                | 2.17 (0.28 , 4.97)          | 186.83 (177.74 , 218.57)               | -                                      |
|                 | 30                | 0.44 (0.36 , 2.45)          | 182.59 (162.5 , 209.01)                | -                                      |
|                 | 60                | 2.6 (1.41 , 8)              | 167.99 (152.5 , 193.34)                | -                                      |
|                 | 360               | 11.65 (9.9 , 13.29)         | 141.68 (97.93 , 181.13)                | -                                      |
|                 | 1440              | 19.67 (14.82 , 28.62)       | 147.93 (112.19 , 158.87)               | 3.73 (2.62 , 4.85)                     |
| x5              | 10                | 0.66 (0.56 , 3.91)          | 194.7 (174.69 , 209.98)                | -                                      |
|                 | 30                | 1.19 (0.48 , 2.48)          | 186.15 (118.13 , 209.8)                | -                                      |
|                 | 60                | 3.79 (2.09 , 8.71)          | 169.85 (167.01 , 192.64)               | -                                      |
|                 | 360               | 16.22 (12.74 , 17.32)       | 178.83 (120.37 , 189.29)               | -                                      |
|                 | 1440              | 22.84 (16.51 , 31.67)       | 156.73 (146.59 , 169.79)               | 2.89 (0.76 , 5.02)                     |
| x10             | 10                | 3 (1.49 , 6.92)             | 169.06 (165.76 , 177.37)               | -                                      |
|                 | 30                | 5.03 (1.13 , 8.13)          | 182.72 (168.93 , 195.74)               | -                                      |
|                 | 60                | 2.68 (1.69 , 19.23)         | 176.3 (155.17 , 181.59)                | -                                      |
|                 | 360               | 17.61 (14.73 , 20.38)       | 164.48 (160.96 , 171.18)               | -                                      |
|                 | 1440              | 17.94 (13.89 , 23.3)        | 160.62 (157.31 , 161.72)               | 2.69 (0.92 , 4.46)                     |

Values were reported as median (range). SLN: sentinel lymph node.

**Table S3.** Results of the regression analysis for square root of the SLN iron amount.

| Variable                 | Value     | Standard error | Z score   | P value | 95% Confidence intervals |
|--------------------------|-----------|----------------|-----------|---------|--------------------------|
| constant                 | -1.24E+00 | 1.34E+00       | -9.21E-01 | 0.3569  | -3.873774, 1.396580      |
| standard deviation sigma | 5.85E-01  | 4.62E-02       | 1.26E+01  | 0.0000  | 0.494063, 0.675250       |
| Time (min)               | 7.94E-03  | 7.66E-04       | 1.04E+01  | 0.0000  | 0.006439, 0.009440       |
| Time sq                  | -4.09E-06 | 4.96E-07       | -8.25E+00 | 0.0000  | -0.000005, -0.000003     |
| Dilution                 | 1.56E-01  | 9.23E-02       | 1.68E+00  | 0.0926  | -0.025785, 0.337471      |
| Dilution sq              | -7.75E-03 | 8.10E-03       | -9.58E-01 | 0.3382  | -0.023624, 0.008116      |
| Injection site           | 3.46E-02  | 1.72E-02       | 2.01E+00  | 0.0445  | 0.000849, 0.068358       |
| Injection site sq        | -1.28E-04 | 5.55E-05       | -2.31E+00 | 0.0208  | -0.000237, -0.000019     |

**Table S4.** Results of the regression analysis for the iron amount at the injection site.

| Variable                 | Value     | Standard error | Z score   | P value | 95% Confidence intervals |
|--------------------------|-----------|----------------|-----------|---------|--------------------------|
| constant                 | 1.75E+02  | 7.20E+00       | 2.43E+01  | 0.000   | 160.890852, 189.105540   |
| standard deviation sigma | 2.19E+01  | 1.73E+00       | 1.26E+01  | 0.000   | 18.476101, 25.251812     |
| Time (min)               | -1.14E-01 | 2.56E-02       | -4.44E+00 | 0.000   | -0.164159, -0.063656     |
| Time sq                  | 6.33E-05  | 1.71E-05       | 3.70E+00  | 0.000   | 0.000030, 0.000097       |
| Dilution                 | 4.33E+00  | 3.43E+00       | 1.26E+00  | 0.207   | -2.397195, 11.054380     |
| Dilution sq              | -3.28E-01 | 3.00E-01       | -1.09E+00 | 0.275   | -0.915252, 0.260188      |
