# Supplementary material for: Artificial Termite-Fishing Tasks as Enrichment for Sanctuary-Housed Chimpanzees: Behavioral Effects and Impact on Welfare
Source: MDPI journal article supplement (doi:10.3390/ani11102941), 2021-10-11
Supplement: s1 [file s1]

**Table S4.** Estimates, standard errors (SE), confidence intervals and *p*-values for Models 1-10. Reference category for phase/condition is baseline condition, for sex is female, for time is morning and for group is Bilinga.

| Models                                                                             | Estimate | SE    | CI (2.5%) | CI (97.5%) | <i>p</i> |
|------------------------------------------------------------------------------------|----------|-------|-----------|------------|----------|
| <b>Model 1: Participation</b> (GLMM: $\chi^2 = 22.54$ , df = 5, $p < 0.001$ )      |          |       |           |            |          |
| Intercept                                                                          | -3.000   | 0.253 |           |            |          |
| Session number                                                                     | 0.091    | 0.031 | 0.030     | 0.153      | <0.05    |
| Sex (male)                                                                         | -0.162   | 0.209 | -0.570    | 0.247      | 0.438    |
| Age                                                                                | -0.024   | 0.105 | -0.230    | 0.183      | 0.823    |
| Time (afternoon)                                                                   | -0.562   | 0.138 | -0.833    | -0.291     | <0.001   |
| Group (Mutamba)                                                                    | 0.303    | 0.211 | 0.110     | 0.717      | 0.150    |
| <b>Model 2: Tool use</b> (GLMM: $\chi^2 = 703.42$ , df = 3, $p < 0.001$ )          |          |       |           |            |          |
| Intercept                                                                          | -9.883   | 0.999 |           |            |          |
| Phase Pre-treatment                                                                | -17.06   | 2884  | -5.669    | 5634.744   | 0.995    |
| Phase Treatment (Enrichment)                                                       | 4.612    | 0.504 | 3.624     | 5.600      | <0.001   |
| Phase Post-treatment                                                               | 2.491    | 0.636 | 1.244     | 3.738      | <0.001   |
| Sex (male)                                                                         | 0.272    | 0.971 | -1.632    | 2.175      | 0.780    |
| Age                                                                                | -0.297   | 0.470 | -1.218    | 0.625      | 0.528    |
| Time (afternoon)                                                                   | -1.091   | 0.122 | -1.330    | -0.851     | <0.001   |
| Group (Mutamba)                                                                    | 1.167    | 0.942 | -0.680    | 3.013      | 0.216    |
| Scan number                                                                        | 0.004    | 0.000 | 0.003     | 0.004      | <0.001   |
| <b>Model 3: Feeding</b> (GLMM: $\chi^2 = 579.91$ , df = 3, $p < 0.001$ )           |          |       |           |            |          |
| Intercept                                                                          | -0.958   | 0.310 |           |            |          |
| Phase Pre-treatment                                                                | -0.796   | 0.055 | -0.903    | -0.689     | <0.001   |
| Phase Treatment (Enrichment)                                                       | 0.418    | 0.044 | 0.332     | 0.504      | <0.001   |
| Phase Post-treatment                                                               | -0.278   | 0.070 | -0.414    | -0.141     | <0.001   |
| Sex (male)                                                                         | 0.053    | 0.357 | -0.649    | 0.756      | 0.882    |
| Age                                                                                | -0.192   | 0.180 | -0.544    | 0.160      | 0.286    |
| Time (afternoon)                                                                   | -0.734   | 0.040 | -0.812    | -0.656     | <0.001   |
| Group (Mutamba)                                                                    | -0.124   | 0.357 | -0.824    | 0.575      | 0.728    |
| Scan number                                                                        | -0.000   | 0.000 | -0.000    | 0.000      | 0.129    |
| <b>Model 4: Inactivity</b> (GLMM: $\chi^2 = 1609.8$ , df = 3, $p < 0.001$ )        |          |       |           |            |          |
| Intercept                                                                          | -0.254   | 0.241 |           |            |          |
| Phase Pre-treatment                                                                | 1.206    | 0.043 | 1.121     | 1.290      | <0.001   |
| Phase Treatment (Enrichment)                                                       | -0.397   | 0.043 | -0.482    | -0.312     | <0.001   |
| Phase Post-treatment                                                               | -0.094   | 0.060 | 0.212     | 0.025      | 0.121    |
| Sex (male)                                                                         | -0.195   | 0.277 | -0.738    | 0.347      | 0.480    |
| Age                                                                                | 0.053    | 0.139 | -0.220    | 0.325      | 0.704    |
| Time (afternoon)                                                                   | -0.446   | 0.035 | -0.514    | -0.378     | <0.001   |
| Group (Mutamba)                                                                    | -0.158   | 0.276 | -0.698    | 0.383      | 0.568    |
| Scan number                                                                        | -0.001   | 0.000 | -0.001    | -0.001     | <0.001   |
| <b>Model 5: Abnormal behaviors</b> (GLMM: $\chi^2 = 53.08$ , df = 3, $p < 0.001$ ) |          |       |           |            |          |

|                                                                                              |        |       |        |         |        |
|----------------------------------------------------------------------------------------------|--------|-------|--------|---------|--------|
| Intercept                                                                                    | -6.253 | 0.749 |        |         |        |
| Phase Pre-treatment                                                                          | -1.129 | 0.219 | -1.559 | -0.700  | <0.001 |
| Phase Treatment (Enrichment)                                                                 | -0.950 | 0.163 | -1.269 | -0.631  | <0.001 |
| Phase Post-treatment                                                                         | -0.209 | 0.302 | -0.801 | 0.383   | 0.489  |
| Sex (male)                                                                                   | 1.399  | 0.905 | -0.374 | 3.173   | 0.122  |
| Age                                                                                          | 0.265  | 0.432 | -0.582 | 1.112   | 0.540  |
| Time (afternoon)                                                                             | 1.380  | 0.153 | 1.080  | 1.679   | <0.001 |
| Group (Mutamba)                                                                              | -2.780 | 0.914 | -4.571 | -0.989  | <0.001 |
| Scan number                                                                                  | 0.002  | 0.000 | 0.001  | 0.003   | <0.001 |
| <b>Model 6: Self-directed behaviors</b> (GLMM: $\chi^2 = 266.57$ , $df = 3$ , $p < 0.001$ )  |        |       |        |         |        |
| Intercept                                                                                    | -2.585 | 0.426 |        |         |        |
| Phase Pre-treatment                                                                          | -1.395 | 0.095 | -1.582 | -1.208  | <0.001 |
| Phase Treatment (Enrichment)                                                                 | -0.244 | 0.064 | -0.369 | -0.119  | <0.001 |
| Phase Post-treatment                                                                         | -0.362 | 0.110 | -0.576 | -0.147  | <0.001 |
| Sex (male)                                                                                   | 0.227  | 0.491 | -0.736 | 1.190   | 0.645  |
| Age                                                                                          | -0.082 | 0.248 | -0.568 | 0.405   | 0.743  |
| Time (afternoon)                                                                             | 0.105  | 0.058 | -0.009 | 0.219   | 0.072  |
| Group (Mutamba)                                                                              | -0.833 | 0.492 | -1.798 | 0.132   | 0.091  |
| Scan number                                                                                  | 0.001  | 0.058 | 0.001  | 0.002   | <0.001 |
| <b>Model 7: Social proximity</b> (GLMM: $\chi^2 = 1127.6$ , $df = 3$ , $p < 0.001$ )         |        |       |        |         |        |
| Intercept                                                                                    | -2.770 | 0.330 |        |         |        |
| Phase Pre-treatment                                                                          | 1.610  | 0.063 | 1.486  | 1.73406 | <0.001 |
| Phase Treatment (Enrichment)                                                                 | -0.154 | 0.070 | -0.292 | -0.016  | <0.05  |
| Phase Post-treatment                                                                         | 0.332  | 0.100 | 0.137  | 0.528   | <0.001 |
| Sex (male)                                                                                   | -0.887 | 0.377 | -1.627 | -0.148  | <0.05  |
| Age                                                                                          | -0.020 | 0.191 | -0.395 | 0.354   | 0.915  |
| Time (afternoon)                                                                             | 0.375  | 0.049 | 0.280  | 0.471   | <0.001 |
| Group (Mutamba)                                                                              | 0.415  | 0.379 | -0.327 | 1.158   | 0.273  |
| Scan number                                                                                  | 0.001  | 0.000 | 0.001  | 0.001   | <0.001 |
| <b>Model 8: Affiliative interactions</b> (GLMM: $\chi^2 = 100.42$ , $df = 3$ , $p < 0.001$ ) |        |       |        |         |        |
| Intercept                                                                                    | -3.346 | 0.489 |        |         |        |
| Phase Pre-treatment                                                                          | -0.474 | 0.074 | -0.618 | -0.330  | <0.001 |
| Phase Treatment (Enrichment)                                                                 | 0.071  | 0.057 | -0.040 | 0.182   | 0.209  |
| Phase Post-treatment                                                                         | 0.353  | 0.086 | 0.186  | 0.521   | <0.001 |
| Sex (male)                                                                                   | -1.155 | 0.570 | -2.272 | -0.038  | <0.05  |
| Age                                                                                          | -0.001 | 0.285 | -0.559 | 0.557   | 1.000  |
| Time (afternoon)                                                                             | 1.255  | 0.050 | 1.157  | 1.354   | <0.001 |
| Group (Mutamba)                                                                              | 1.830  | 0.570 | 0.712  | 2.947   | <0.05  |
| Scan number                                                                                  | 0.001  | 0.000 | 0.000  | 0.001   | <0.001 |
| <b>Model 9: Agonistic interactions</b> (GLMM: $\chi^2 = 9.765$ , $df = 3$ , $p < 0.05$ )     |        |       |        |         |        |
| Intercept                                                                                    | -6.891 | 0.555 |        |         |        |

|                                                                                  |        |       |        |        |        |
|----------------------------------------------------------------------------------|--------|-------|--------|--------|--------|
| Phase Pre-treatment                                                              | -0.224 | 0.312 | -0.835 | 0.386  | 0.471  |
| Phase Treatment (Enrichment)                                                     | 0.543  | 0.241 | 0.071  | 1.016  | <0.05  |
| Phase Post-treatment                                                             | 0.278  | 0.342 | -0.392 | 0.949  | 0.416  |
| Sex (male)                                                                       | 1.717  | 0.526 | 0.686  | 2.747  | <0.05  |
| Age                                                                              | -0.334 | 0.231 | -0.788 | -0.079 | 0.149  |
| Time (afternoon)                                                                 | 0.983  | 0.202 | 0.587  | 1.379  | <0.001 |
| Group (Mutamba)                                                                  | -0.543 | 0.487 | -1.500 | 0.412  | 0.265  |
| Scan number                                                                      | -0.001 | 0.001 | -0.002 | 0.000  | 0.051  |
| <b>Model 10: SNA Proximity</b> (GLMM: $\chi^2 = 2.38$ , $df = 3$ , $p = 0.498$ ) |        |       |        |        |        |
| Intercept                                                                        | 0.492  | 0.112 |        |        |        |
| Condition                                                                        | 0.052  | 0.102 | -0.148 | 0.252  | 0.608  |
| Group (Mutamba)                                                                  | 0.068  | 0.159 | -0.243 | 0.379  | 0.668  |
| Condition: Group (Mutamba)                                                       | 0.079  | 0.144 | -0.204 | 0.362  | 0.582  |

**Table S5.** Estimates, standard errors (SE) and *p*-values for post-hoc comparisons in Models 2-9. In all models, estimates are in logit-scale.

| <b>Models</b>                              | <b>Estimate ± SE</b>       | <b><i>P</i></b> |
|--------------------------------------------|----------------------------|-----------------|
| <b>Model 2: Tool use</b>                   |                            |                 |
| Enrichment condition > Baseline condition  | -4.13 ± 0.48, -8.74 ± 0.69 | < <b>0.001</b>  |
| Enrichment condition > Pre-treatment phase | -25.80 ± 2883.63           | 1.000           |
| Pre-treatment phase < Post-treatment phase |                            | 1.000           |
| <b>Model 3: Feeding</b>                    |                            |                 |
| Enrichment condition > Baseline condition  | -0.99 ± 0.17, -1.41 ± 0.17 | < <b>0.001</b>  |
| Enrichment condition > Pre-treatment phase | -2.20 ± 0.18               | < <b>0.001</b>  |
| Pre-treatment phase < Post-treatment phase |                            | < <b>0.001</b>  |
| <b>Model 4: Inactivity</b>                 |                            |                 |
| Enrichment condition < Baseline condition  | -1.28 ± 0.14, -0.88 ± 0.14 | < <b>0.001</b>  |
| Enrichment condition < Pre-treatment phase | 0.32 ± 0.14                | < <b>0.001</b>  |
| Pre-treatment phase > Post-treatment phase |                            | < <b>0.001</b>  |
| <b>Model 5: Abnormal behaviors</b>         |                            |                 |
| Enrichment condition < Baseline condition  | -6.69 ± 0.49, -5.74 ± 0.47 | < <b>0.001</b>  |
| Enrichment condition = Pre-treatment phase | -6.87 ± 0.50               | 0.880           |
| Pre-treatment phase < Post-treatment phase |                            | < <b>0.05</b>   |
| <b>Model 6: Self-directed behaviors</b>    |                            |                 |
| Enrichment condition < Baseline condition  | -2.76 ± 0.24, -2.51 ± 0.24 | < <b>0.001</b>  |
| Enrichment condition > Pre-treatment phase | -3.91 ± 0.25               | < <b>0.001</b>  |
| Pre-treatment phase < Post-treatment phase |                            | < <b>0.001</b>  |
| <b>Model 7: Social proximity</b>           |                            |                 |
| Enrichment condition = Baseline condition  | -2.74 ± 0.19, -2.59 ± 0.19 | 0.125           |
| Enrichment condition < Pre-treatment phase | -0.98 ± 0.18               | < <b>0.001</b>  |
| Pre-treatment phase > Post-treatment phase |                            | < <b>0.001</b>  |
| <b>Model 8: Affiliative interactions</b>   |                            |                 |
| Enrichment condition = Baseline condition  | -2.11 ± 0.28, -2.18±0.28   | 0.591           |
| Enrichment condition > Pre-treatment phase | -2.65±0.28                 | < <b>0.001</b>  |
| Pre-treatment phase < Post-treatment phase |                            | < <b>0.001</b>  |
| <b>Model 9: Agonistic interactions</b>     |                            |                 |
| Enrichment condition = Baseline condition  | -5.60± 0.29, -6.14 ± 0.32  | 0.109           |
| Enrichment condition > Pre-treatment phase | -6.37 ± 0.35               | < <b>0.05</b>   |
| Pre-treatment phase = Post-treatment phase |                            | 0.501           |
