# Supplementary material for: Artificial Termite-Fishing Tasks as Enrichment for Sanctuary-Housed Chimpanzees: Behavioral Effects and Impact on Welfare
Source: MDPI journal article supplement (doi:10.3390/ani11102941), 2021-10-11
Supplement: s1 [file s1]

**Table S1. Biographical information on the chimpanzees from the study sample.**

| <b>Subject</b> | <b>Sex</b> | <b>Group</b> | <b>Year of birth</b> | <b>Origin</b> | <b>Former use</b> | <b>Rescue year (at Mona)</b> |
|----------------|------------|--------------|----------------------|---------------|-------------------|------------------------------|
| Africa         | F          | Mutamba      | 1999                 | wild          | Pet               | 2009                         |
| Bea            | F          | Bilinga      | 1985                 | wild          | Entertainment     | 2012                         |
| Bongo          | M          | Mutamba      | 2000                 | captive       | Entertainment     | 2002                         |
| Charly         | M          | Mutamba      | 1989                 | captive       | Entertainment     | 2001                         |
| Cheeta         | F          | Bilinga      | 1990                 | wild          | Entertainment     | 2015                         |
| Coco           | F          | Bilinga      | 1994                 | wild          | Pet/Entertainment | 2012                         |
| Juanito        | M          | Mutamba      | 2003                 | captive       | Pet/Entertainment | 2005                         |
| Marco          | M          | Mutamba      | 1984                 | captive       | Entertainment     | 2001                         |
| Nico           | M          | Bilinga      | 2001                 | captive       | Pet/Entertainment | 2004                         |
| Tico           | M          | Bilinga      | 1987                 | wild          | Entertainment     | 2005                         |
| Tom            | M          | Bilinga      | 1985                 | Wild          | Entertainment     | 2011                         |
| Toni           | M          | Mutamba      | 1983                 | wild          | Entertainment     | 2001                         |
| Victor         | M          | Bilinga      | 1982                 | captive       | Entertainment     | 2006                         |
| Waty           | F          | Mutamba      | 1997                 | captive       | Pet/Entertainment | 2001                         |
