# Supplementary material for: Artificial Termite-Fishing Tasks as Enrichment for Sanctuary-Housed Chimpanzees: Behavioral Effects and Impact on Welfare
Source: MDPI journal article supplement (doi:10.3390/ani11102941), 2021-10-11
Supplement: s1 [file s1]

(a) Mutamba group

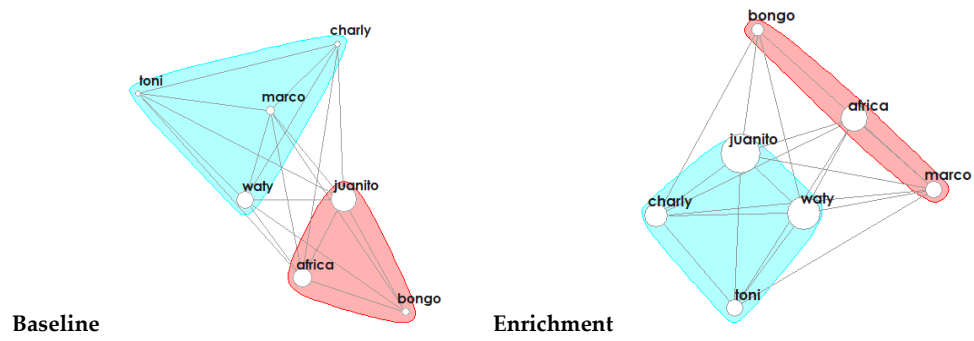

(b) Bilinga group

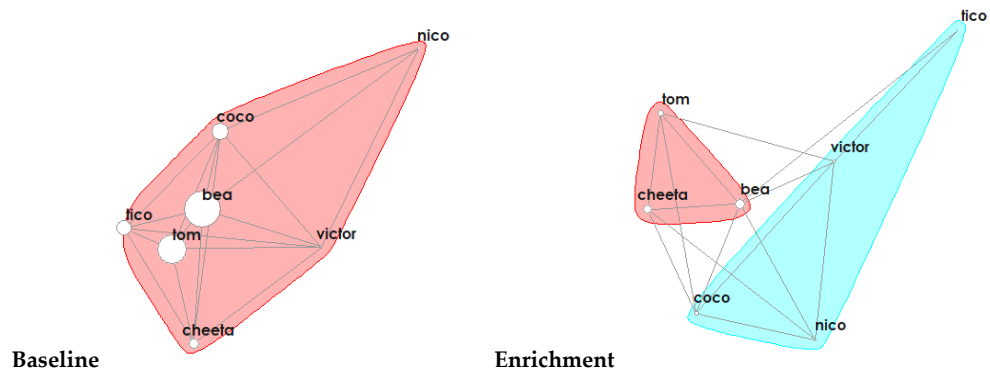

**Figure S1. Sociograms comparing social proximity (one-arm length) across control and enriched conditions in each chimpanzee group.** Nodes are sized according to subjects' centrality degree (strength) and edges represent dyadic associations. Colors indicate different communities in which subjects are more strongly associated (higher incidence of social proximity). N=7 in both groups.
